# Supplementary material for: An efficient approach to homocoupling of terminal alkynes: Solvent-free synthesis of 1,3-diynes using catalyticCu(ii) and base
Source: Royal Society of Chemistry journal article supplement (doi:10.1039/b917448f), 2009-10-30
Supplement: b917448f.pdf [file b917448f.pdf]

# Supporting Information

## An efficient approach to homocoupling of terminal alkynes: Solvent-free synthesis of 1,3-diynes using catalytic Cu(II) and base

Dong Wang, Jihui Li, Na Li, Tingting Gao, Sihua Hou and Baohua Chen\*

Key Laboratory of Nonferrous Metal Chemistry and Resources Utilization of Gansu Province, Lanzhou 730000, P.R. of China; State Key Laboratory of Applied Organic Chemistry Lanzhou University, Lanzhou 730000, P.R. of China

E-mail: [chbh@lzu.edu.cn](mailto:chbh@lzu.edu.cn)

### Table of Contents

1. General Remarks S2
2. General procedure of synthesis S2
3. General procedure of catalyst reactivation S2
4. Spectral data of the compounds S2-S9
5. References S10
6.  $^1\text{H}$  and  $^{13}\text{C}$  NMR spectra of the unsymmetric 1,3-diynes S10-S16

## 1. General Remarks:

Flash column chromatography was performed using silica gel (300–400 mesh). Analytical thin-layer chromatography was performed using glass plates pre-coated with 200–400 mesh silica gel impregnated with a fluorescent indicator (254 nm). NMR spectra were recorded in CDCl<sub>3</sub> on a Varian Inova-300 or 400 MHz NMR spectrometer with TMS as an internal reference. Copies of <sup>1</sup>H NMR and <sup>13</sup>C NMR spectra of the unsymmetric 1,3-diynes are provided.

## 2. General procedure for the preparation of unsymmetric 1,3-diynes. Synthesis of 1-methoxy-4-(phenylbuta-1,3-diynyl)benzene (3a):

A typical reaction procedure: to a mixture of CuCl<sub>2</sub> (5.0 mol%) and Et<sub>3</sub>N (5.0 mol%), phenylacetylene (3 mmol) and p-methoxyphenylacetylene (0.5mmol) were added. The mixture was stirred at 60 °C in air for 10 hours. After cooling to room temperature, the mixture was diluted with ethyl acetate and filtered. The filtrate was removed under reduced pressure to get the crude product, which was further purified by silica gel chromatography (petroleum ether as eluent) to yield corresponding unsymmetric 1,3-diynes.

## 3. General procedure of catalyst reactivation

The reaction mixture was cooled to room temperature, diluted with dichloromethane, and then filtered. The filtration residue was placed in a beaker, where 2mL HCl of 0.01M was added for every 10 mg filtration residue. The mixture was dried in vacuum for 6 h at 100°C to produce the recycled catalyst.

## 4. Spectral data of the compounds:

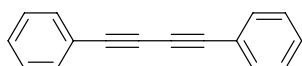

2a

**1,4-diphenyl buta-1,3-diyne (2a)**<sup>1</sup>: **2a** was purified by flash chromatography (petroleum ether – ethyl acetate, v/v 40/1) as white solid (yield >96%). <sup>1</sup>H NMR (400 MHz, CDCl<sub>3</sub>): δ<sub>H</sub> 7.52 (d, *J* = 6.87 Hz, 4 H), 7.28-7.40 (m, 6 H). <sup>13</sup>C NMR (100MHz, CDCl<sub>3</sub>): δ<sub>C</sub> 132.4, 129.2, 128.4, 121.7, 81.5, 73.8.

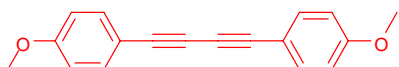

2b

**1,4-bis(p-methoxyphenyl)buta-1,3-diyne (2b)**<sup>2, 3</sup>: **2b** was purified by flash chromatography (petroleum ether – ethyl acetate, v/v 40/1) as white solid (yield 99%). <sup>1</sup>H NMR (300 MHz, CDCl<sub>3</sub>): δ<sub>H</sub> 7.46 (d, *J* = 8.4 Hz, 4H), 6.85 (d, *J* = 8.4 Hz, 4H), 3.81 (s, 6H). <sup>13</sup>C NMR (75 MHz, CDCl<sub>3</sub>): δ<sub>C</sub> 160.42, 134.23, 114.32, 114.11, 81.42, 73.14, 55.52.

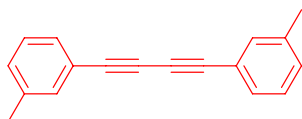

2c

**1,4-bis(m-methylphenyl)buta-1,3-diyne (2c)**<sup>4</sup>: **2c** was purified by flash chromatography (petroleum ether – ethyl acetate, v/v 40/1) as white solid (yield >98%). <sup>1</sup>H NMR (300 MHz, CDCl<sub>3</sub>): δ<sub>H</sub> 7.33 (m, 4H), 7.24-7.18 (m, 4H), 2.33 (s, 6H). <sup>13</sup>C NMR (75 MHz, CDCl<sub>3</sub>): δ<sub>C</sub> 138.1, 133.0, 130.1, 129.6, 128.3, 121.6, 81.6, 73.6, 21.2.

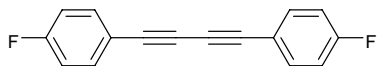

2d

**1,4-bis(p-fluorophenyl)buta-1,3-diyne (2d)**<sup>4</sup>: **2d** was purified by flash chromatography (petroleum ether – ethyl acetate, v/v 40/1) as white solid (yield 80%). <sup>1</sup>H NMR (300 MHz, CDCl<sub>3</sub>): δ<sub>H</sub> 7.53-7.48 (m, 4H), 7.06-7.00 (m, 4H). <sup>13</sup>C NMR (75 MHz, CDCl<sub>3</sub>): δ<sub>C</sub>

164.9, 161.2, 134.6, 134.5, 117.84, 117.78, 116.1, 115.7, 80.4, 73.5.

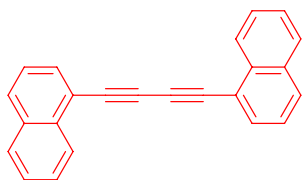

2e

**1,4-dinaphthyl buta-1,3-diyne (2e)**<sup>5</sup> : **2e** was purified by flash chromatography (petroleum ether – ethyl acetate, v/v 40/1) as yellow solid (yield 88%). <sup>1</sup>H NMR (300 MHz, CDCl<sub>3</sub>): δ<sub>H</sub> 8.44 (d, *J* = 8.3 Hz, 2H), 7.90 (d, *J* = 8.3 Hz, 2H), 7.85 (d, *J* = 8.3 Hz, 2H), 7.84 (dd, *J* = 7.2, 1.3 Hz, 2H), 7.64 (ddd, *J* = 8.3, 7.0, 1.3 Hz, 2H), 7.56 (ddd, *J* = 8.3, 7.0, 1.3 Hz, 2H), 7.47 (dd, *J* = 8.3, 7.2 Hz, 2H). <sup>13</sup>C NMR (75 MHz, CDCl<sub>3</sub>): δ<sub>C</sub> 133.8, 133.1, 132.0, 129.7, 128.4, 127.2, 126.6, 126.1, 125.2, 119.5, 80.9, 78.6.

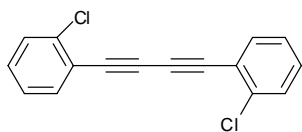

2f

**1,4-bis(o-chlorophenyl)buta-1,3-diyne (2f)**<sup>6</sup> : **2f** was purified by flash chromatography (petroleum ether – ethyl acetate, v/v 40/1) as white solid (yield 85%). <sup>1</sup>H NMR (400 MHz, CDCl<sub>3</sub>): δ<sub>H</sub> 7.57 (d, *J* = 7.6 Hz, 2H), 7.42 (d, *J* = 7.6 Hz, 2H), 7.31 (t, *J* = 7.6 Hz, 2H), 7.24 (t, *J* = 7.6 Hz, 2H). <sup>13</sup>C NMR (100 MHz, CDCl<sub>3</sub>): δ<sub>C</sub> 137.38, 134.79, 130.70, 129.87, 126.98, 122.21, 79.82, 78.78.

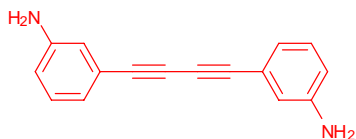

2g

**1,4-bis(m-aminophenyl)buta-1,3-diyne (2g)**<sup>7</sup> : **2g** was purified by flash chromatography (petroleum ether – ethyl acetate, v/v 40/1) as yellow liquid (yield 50%).

$^1\text{H}$  NMR (300 MHz,  $\text{CDCl}_3$ ):  $\delta_{\text{H}}$  7.23 (t, 2H), 7.11-7.05 (t, 2H), 6.90-6.87 (t, 2H), 6.65-6.62 (t, 2H), 3.59(s, 4H).  $^{13}\text{C}$  NMR (75 MHz,  $\text{CDCl}_3$ ):  $\delta_{\text{C}}$  146.1, 129.2, 122.6, 122.3, 118.2, 115.7, 83.8, 76.5.

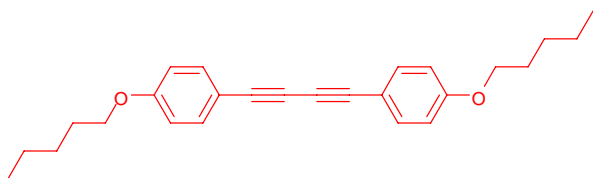

2h

**1,4-bis(p-n-pentyloxyphenyl)buta-1,3-diyne (2h)**<sup>8</sup> : **2h** was purified by flash chromatography (petroleum ether – ethyl acetate, v/v 40/1) as white solid (yield >98%).  $^1\text{H}$  NMR (300 MHz,  $\text{CDCl}_3$ ):  $\delta_{\text{H}}$  7.42 (d,  $J=5.9\text{Hz}$ , 2H), 6.81 (d,  $J=5.9\text{Hz}$ , 2H), 3.93 (t,  $J=5.9\text{Hz}$ , 2H), 1.80-1.73 (m, 2H), 1.50-1.33 (m, 4H), 0.91 (t,  $J=5.9\text{Hz}$ , 3H).  $^{13}\text{C}$  NMR (75 MHz,  $\text{CDCl}_3$ ):  $\delta_{\text{C}}$  159.9, 134.1, 114.7, 113.7, 81.4, 72.9, 68.2, 29.0, 28.3, 22.6, 14.2.

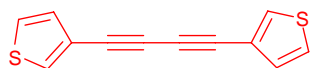

2i

**1,4-dithienyl buta-1,3-diyne (2i)**<sup>9</sup> : **2i** was purified by flash chromatography (petroleum ether – ethyl acetate, v/v 40/1) as white solid (yield 90%).  $^1\text{H}$  NMR (300 MHz,  $\text{CDCl}_3$ ):  $\delta_{\text{H}}$  7.57 (d,  $J=6.1\text{Hz}$ , 2H), 7.27 (s, 2H), 7.16 (d,  $J=5.4\text{Hz}$ , 2H).  $^{13}\text{C}$  NMR (75 MHz,  $\text{CDCl}_3$ ):  $\delta_{\text{C}}$  131.2, 130.1, 128.4, 125.5, 120.8, 73.5.

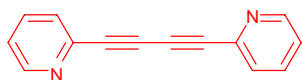

2j

**1,4-Bis(2-pyridine)buta-1,3-diyne (2j)**<sup>10</sup> : **2j** was purified by flash chromatography (petroleum ether – ethyl acetate, v/v 40/1) as colorless oil (yield 70%).  $^1\text{H}$  NMR (400 MHz,  $\text{CDCl}_3$ ):  $\delta_{\text{H}}$  8.63 (d,  $J = 4.4 \text{ Hz}$ , 2H), 7.71 (t,  $J = 7.6 \text{ Hz}$ , 2H), 7.56 (d,  $J = 8.4 \text{ Hz}$ , 2H), 7.31 (t,  $J = 4.8 \text{ Hz}$ , 2H).  $^{13}\text{C}$  NMR (100 MHz,  $\text{CDCl}_3$ ):  $\delta_{\text{C}}$  150.3, 141.8, 134.3, 128.4,

123.8, 80.8, 73.2.

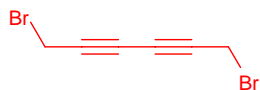

2k

**1,6-dibromo buta-2,4-diyne (2k)**<sup>11</sup>: **2k** was purified by flash chromatography (petroleum ether – ethyl acetate, v/v 5/1) as pale yellow oil (yield 60%). <sup>1</sup>H NMR (400 MHz, CDCl<sub>3</sub>): δ<sub>H</sub> 3.99 (s, 4H). <sup>13</sup>C NMR (100 MHz, CDCl<sub>3</sub>): δ<sub>C</sub> 75.27, 70.29, 13.96

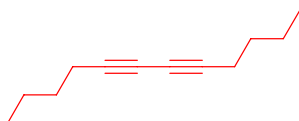

2l

**5,7-dodecadiyne (2l)**<sup>1</sup>: **2l** was purified by flash chromatography (petroleum ether – ethyl acetate, v/v 40/1) as pale yellow oil (yield 75%). <sup>1</sup>H NMR (400 MHz, CDCl<sub>3</sub>): 2.18 (t, *J* = 7.3 Hz, 4 H), 1.43 (m, 4 H), 1.35 (m, 4 H), 0.83 (t, *J* = 7.3 Hz, 6 H). <sup>13</sup>C NMR (100 MHz, CDCl<sub>3</sub>): δ<sub>C</sub> 76.6, 65.1, 30.3, 21.8, 18.8, 13.5.

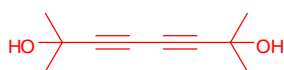

2m

**2,7-dimethyl octa-3,5-diyne-2,7-diol (2m)**<sup>4</sup>: **2m** was purified by flash chromatography (ethyl acetate) as white solid (yield 40%). <sup>1</sup>H NMR (270 MHz, CDCl<sub>3</sub>): δ<sub>H</sub> 1.99(s, 2H), 1.56(s, 12H). <sup>13</sup>C NMR (67.8 MHz, CDCl<sub>3</sub>): δ<sub>C</sub> 84.0, 66.3, 65.6, 31.0.

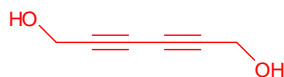

2n

**hexa-2,4-diyne-1,6-diol (2n)**<sup>4</sup>: **2n** was purified by flash chromatography (ethyl acetate)

as white solid (yield 45%).  $^1\text{H}$  NMR (270 MHz, DMSO- $\text{D}_6$ ):  $\delta_{\text{H}}$  5.16 (s, 2H), 4.17 (s, 4H).  $^{13}\text{C}$  NMR (67.8 MHz, DMSO- $\text{D}_6$ ):  $\delta_{\text{C}}$  79.5, 67.9, 49.3.

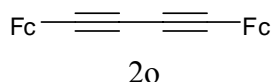

**1,4-diferrocenyl buta-1,3-diyne (2o)**<sup>12</sup> : **2o** was purified by flash chromatography (petroleum ether – ethyl acetate, v/v 5/1) as red solid (yield 75%).  $^1\text{H}$  NMR (300 MHz,  $\text{CDCl}_3$ ):  $\delta_{\text{H}}$  4.51 (s, 4H), 4.26 (s, 14H).  $^{13}\text{C}$  NMR (75 MHz,  $\text{CDCl}_3$ ):  $\delta_{\text{C}}$  82.6, 73.5, 71.7, 70.0, 68.7, 63.8.

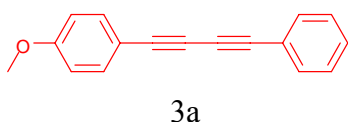

**1-methoxy-4-(phenylbuta-1,3-diynyl)benzene(3a)**<sup>13</sup> : **3a** was purified by flash chromatography (petroleum ether) as white solid (yield 70%).  $^1\text{H}$  NMR (400 MHz,  $\text{CDCl}_3$ ):  $\delta_{\text{H}}$  7.46-7.52(m, 4H), 7.25-7.35(m, 3H), 6.85(d,  $J=8.0$  Hz, 2H), 3.81(s, 3H).  $^{13}\text{C}$  NMR (100 MHz,  $\text{CDCl}_3$ ):  $\delta_{\text{C}}$  160.36, 134.10, 132.40, 129.00, 128.39, 122.00, 114.15, 113.69, 81.81, 81.01, 74.17, 72.73, 55.31.

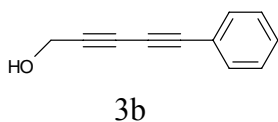

**5-phenylpenta-2,4-diyne-1-ol(3b)**<sup>14</sup> : **3b** was purified by flash chromatography (petroleum ether – ethyl acetate, v/v 10/1) as yellow oil (yield 35%).  $^1\text{H}$  NMR (400 MHz,  $\text{CDCl}_3$ ):  $\delta_{\text{H}}$  7.48(t,  $J=4.0$  Hz, 2H), 7.30-7.37(m, 3H), 4.42(s, 2H), 2.09(s, 1H).  $^{13}\text{C}$  NMR (100 MHz,  $\text{CDCl}_3$ ):  $\delta_{\text{C}}$  132.58, 129.34, 128.40, 121.35, 80.41, 78.58, 73.14, 70.45, 51.64.

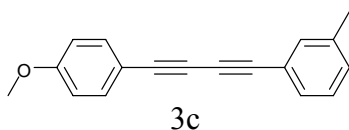

**1-((4-methoxyphenyl)buta-1,3-diynyl)-3-methylbenzene(3c)**: **3c** was purified by flash

chromatography (petroleum ether) as white solid (yield 55%). mp : 59-60°C. IR (cm<sup>-1</sup>): 2957.09, 2929.93, 2837.43, 2217.48, 2143.21, 1602.42, 1508.33, 1251.67, 1173.54, 1032.20, 830.79. <sup>1</sup>H NMR (400 MHz, CDCl<sub>3</sub>): δ<sub>H</sub> 7.45-7.49(m, 2H), 7.32(d, *J*=8.4 Hz, 2H), 7.16-7.26(m, 2H), 6.84-6.87(m, 2H), 3.82(s, 3H), 2.33(s, 3H). <sup>13</sup>C NMR (100 MHz, CDCl<sub>3</sub>): δ<sub>C</sub> 160.33, 138.13, 134.10, 132.91, 129.97, 129.54, 128.29, 121.79, 114.14, 113.78, 81.59, 81.26, 73.80, 72.80, 55.33, 21.19. MS: *m/z*: 246(M<sup>+</sup>, 100%), 231(45), 203(26), 123(35), 101(27), 88(24), 71(19), 57(39), 43(39). Elemental analysis: found: C, 87.70; H, 5.81. Calc. for C<sub>18</sub>H<sub>14</sub>O: C, 87.78; H, 5.73%.

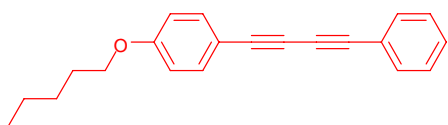

3d

**1-(pentyloxy)-4-(phenylbuta-1,3-diyne)benzene(3d):** 3d was purified by flash chromatography (petroleum ether) as white solid (yield 72%). mp : 60-61°C. IR (cm<sup>-1</sup>): 2953.42, 2865.73, 2206.74, 2138.96, 1597.76, 1506.69, 1249.22, 1170.96, 1019.28, 830.05, 749.45. <sup>1</sup>H NMR (400 MHz, CDCl<sub>3</sub>): δ<sub>H</sub> 7.50-7.53(m, 2H), 7.45(d, *J*=8.0 Hz, 2H), 7.32-7.36(m, 3H), 6.84(d, *J*=8.8 Hz, 2H), 3.96(t, *J*=6.4 Hz, 2H), 1.75-7.82(m, 2H), 1.34-1.47(m, 4H), 0.93(t, *J*=7.2 Hz, 3H). <sup>13</sup>C NMR (100 MHz, CDCl<sub>3</sub>): δ<sub>C</sub> 160.02, 134.10, 132.43, 128.98, 128.40, 122.10, 114.09, 113.44, 81.91, 80.97, 74.24, 72.65, 68.15, 28.83, 28.15, 22.42, 13.98. MS: *m/z*: 288(M<sup>+</sup>, 25%), 218(100), 203(26), 189(18), 43(42). Elemental analysis: found: C, 87.30; H, 6.85. Calc. for C<sub>21</sub>H<sub>20</sub>O: C, 87.46; H, 6.99%.

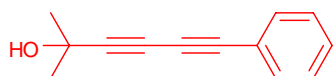

3e

**2-methyl-6-phenylhexa-3,5-diyne-2-ol(3e)** <sup>15</sup>: 3e was purified by flash chromatography (petroleum ether – ethyl acetate, v/v 10/1) as white solid (yield 32%). <sup>1</sup>H NMR (400 MHz, CDCl<sub>3</sub>): δ<sub>H</sub> 7.47(t, *J*=4.0 Hz, 2H), 7.26-7.38(m, 3H), 2.09(s, 1H), 1.58(s, 6H). <sup>13</sup>C NMR (100 MHz, CDCl<sub>3</sub>): δ<sub>C</sub> 132.50, 129.23, 128.40, 121.53, 86.65, 78.79, 73.11, 67.05, 65.75, 31.10.



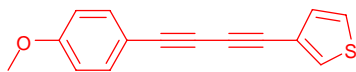

3f

**3-((4-methoxyphenyl)buta-1,3-diyne)thiophene (3f):** **3f** was purified by flash chromatography (petroleum ether) as pale yellow solid (yield 56%). **mp** : 87-88°C. **IR** (cm<sup>-1</sup>): 3385.71, 3108.54, 2921.31, 2141.38, 1599.18, 1503.40, 1249.39, 1029.90, 830.88, 786.12. <sup>1</sup>H NMR (400 MHz, CDCl<sub>3</sub>): δ<sub>H</sub> 7.56-7.57(m, 1H), 7.46(d, *J*=8.8 Hz, 2H), 7.26-7.28(m, 1H), 7.16-7.17(m, 1H), 6.85(d, *J*=9.2 Hz, 2H), 3.82(s, 3H). <sup>13</sup>C NMR (100 MHz, CDCl<sub>3</sub>): δ<sub>C</sub> 160.38, 134.10, 130.92, 130.17, 125.51, 121.13, 114.17, 113.74, 81.61, 76.18, 73.80, 72.69, 55.34. **MS**: *m/z*: 238(M<sup>+</sup>, 100%), 223(55), 195(29). **Elemental analysis**: found: C, 75.61; H, 4.30. Calc. for C<sub>15</sub>H<sub>10</sub>OS: C, 75.60; H, 4.23%.

## References

- 1 G. Cahiez, A. Moyeux, J. Buendia and C. Duplais, *J. AM. CHEM. SOC.* 2007, **129**, 13788-13789
- 2 A. S. Batsanov, J. C. Collings, I. J. S. Fairlamb, J. P. Holland, J. A. K. Howard, Z. Y. Lin, T. B. Marder, A. C. Parsons, R. M. Ward and J. Zhu, *J. Org. Chem.* 2005, **70**, 703-706
- 3 G. N. Gorshkova, M. A. Chubarova, A. M. Sladkov, L. Y. Ukhin and V. I. Kasatochkin, *Zh. Fiz. Khim.* 1964, **38**, 2516 - 2520.
- 4 K. Kamata, S. Yamaguchi, M. Kotani, K. Yamaguchi and Noritaka Mizuno, *Angew. Chem. Int. Ed.* 2008, **47**, 2407 –2410
- 5 J. G. Rodri'guez and J. L. Tejedor, *Tetrahedron* **61** (2005) 3033–3043
- 6 S. V. Damle, D. Seomoon and P. H. Lee, *J. Org. Chem.* 2003, **68**, 7085-7087
- 7 M. Shi and H. X. Qian, *Appl. Organometal. Chem.* 2006; **20**: 771–774
- 8 T. Dingemans, D. J. Photinos, E. T. Samulski, A. F. Terzis and C. Wutz, *J. Chem. Phys.*, Vol. **118**, No. 15, 15 April 2003
- 9 J. P. Beny, S. N. Dhawan, J. Kagan, and S. Sundlas, *J. Org. Chem.* 1982, **47**, 2201-2204
- 10 J. H. Li, Y. Liang and Y. X. Xie, *J. Org. Chem.* 2005, **70**, 4393-4396
- 11 C. Werner, H. Hopf, I. Dix, P. Bubenitschek and P. G. Jones, *Chem. Eur. J.* 2007, **13**, 9462 – 9477
- 12 K. Kowalski and S. Domagala, *J. Organometallic. Chem.* 2007, **692**, 3100.
- 13 Y. Nishihara, K. Ikegashira, K. Hirabayashi, J. I. Ando, A. Mori and T. Hiyama, *J. Org. Chem.* 2000, **65**, 1780-1787
- 14 T. Kawasaki, S. Saito and Y. Yamamoto, *J. Org. Chem.* 2002, **67**, 2653-2658
- 15 F. Freeman, H. Y. Lu and Q. B. Zeng, *J. Org. Chem.* 1994, **59**, 4350-4354

3a:

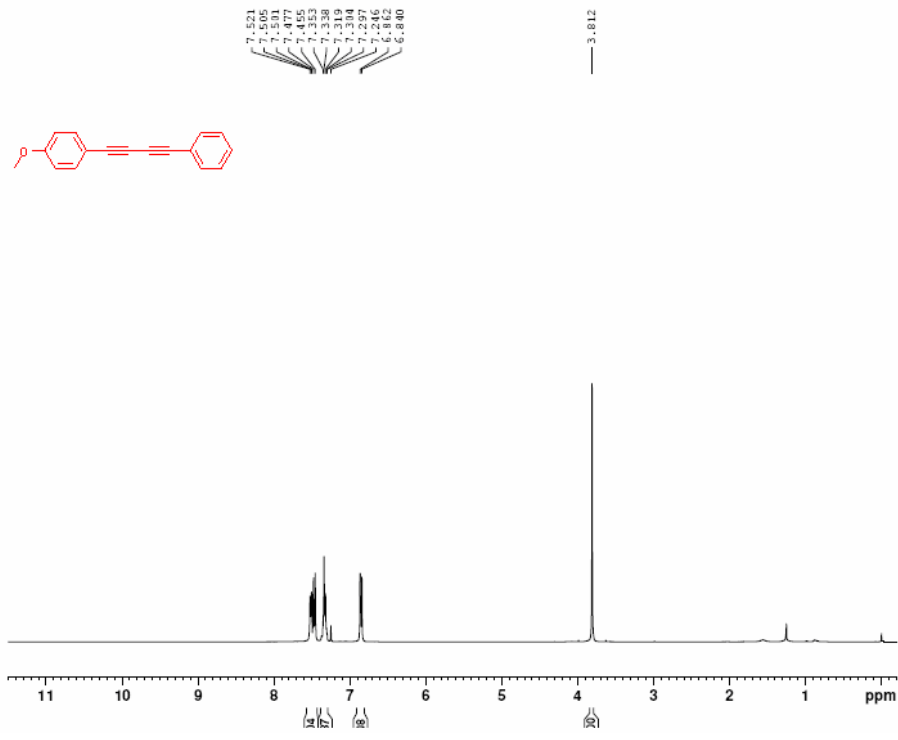

```

NAME      wd0818-1
EXPNO    10
PROCNO   1
Data_    20090818
Time     16:14
INSTRUM  spect
PROBHD   5 mm DABBO BB-
PULPROG  zgpg30
TD       65536
SOLVENT  CDCl3
NS       16
DS       2
SWH      8223.688 Hz
FIDRES   0.125483 Hz
AQ       3.9846387 sec
RG       141
DW       60.980 usec
DE       6.50 usec
TE       295.8 K
TE       1.00000000 sec
DI       1
TD0      1

```

---

```

----- CHANNEL f1 -----
NUC1     1H
P1       12.00 usec
PL1     -3.50 dB
PL12    22.90425692 W
SFO1    400.1324710 MHz
SI       32768
SF       400.1300196 MHz
WUW     EM
SBS     0
LB      0.30 Hz
GB      0
PC      1.00

```

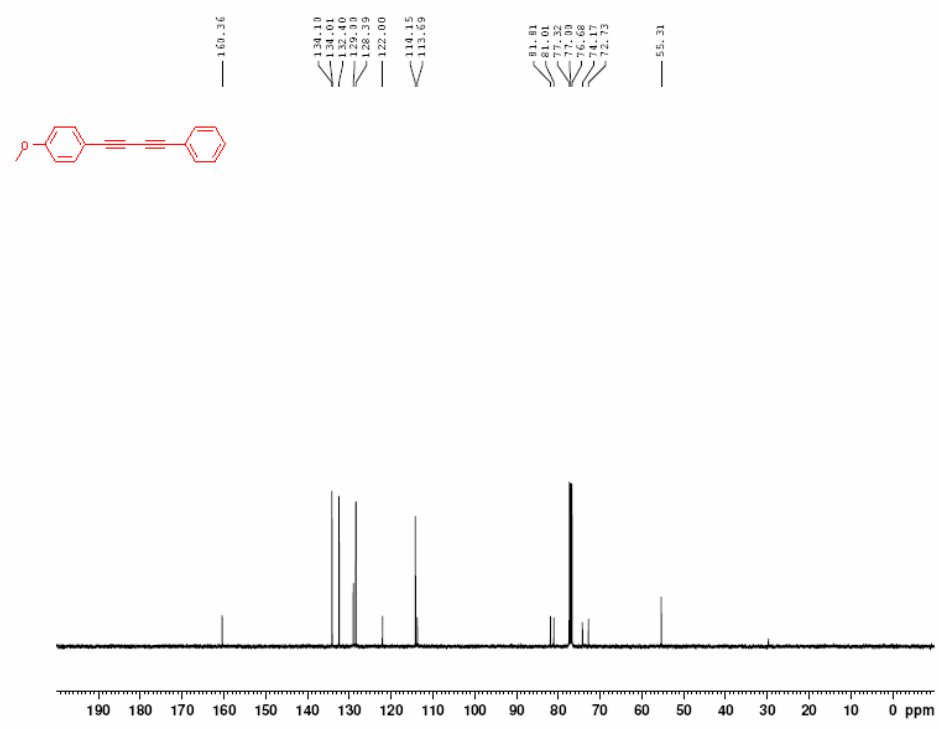

```

NAME      wd0818-1
EXPNO    11
PROCNO   1
Data_    20090818
Time     16:29
INSTRUM  spect
PROBHD   5 mm DABBO BB-
PULPROG  zgpg30
TD       65536
SOLVENT  CDCl3
NS       200
DS       4
SWH      24038.461 Hz
FIDRES   0.366198 Hz
AQ       1.3631988 sec
RG       2500
DW       20.800 usec
DE       6.50 usec
TE       296.0 K
TE       2.00000000 sec
DI       0.03000000 sec
TD0      1

```

---

```

----- CHANNEL f1 -----
NUC1     13C
P1       9.40 usec
PL1     -2.00 dB
PL12    57.32743073 W
SFO1    100.6282698 MHz

```

---

```

----- CHANNEL f2 -----
CPDPRG2  waltz16
NUC2     1H
PCPD2    90.00 usec
PL2     -2.00 dB
PL12    15.00 dB
PL13    15.00 dB
PL14    19.19449461 W
PL15    0.32353121 W
SFO2    400.1316005 MHz
SI       32768
SF       100.6177719 MHz
WUW     EM
SBS     0
LB      1.00 Hz
GB      0
PC      1.40

```

3b:

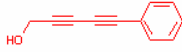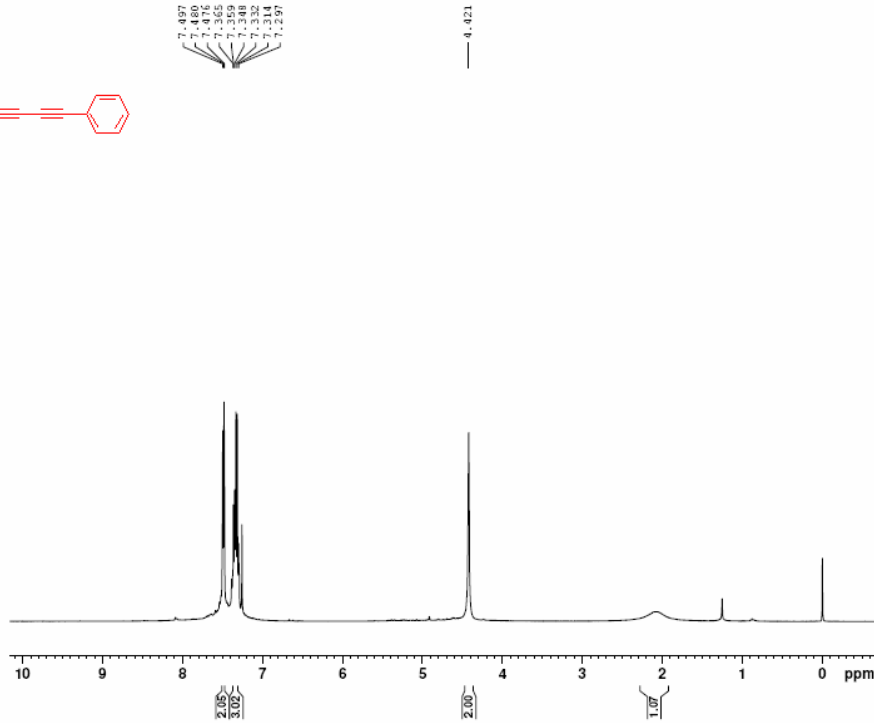

```

NAME      wd0918-2
EXPNO     10
PROCNO    1
Data_     20090919
Time      16.36
INSTRUM   spect
PROBHD    5 mm DABBO BB-
PULPROG   epgq30
TD         65536
SOLVENT   CDCl3
NS         16
DS         4
SWH        8223.695 Hz
FIDRES     0.125493 Hz
AQ         3.9846397 sec
RG         203
DW         60.800 usec
DE         6.50 usec
TE         295.2 K
D1         1.00000000 sec
D11        1
TD0        1
    
```

```

----- CHANNEL f1 -----
NUC1       1H
P1         12.00 usec
PL1        -3.00 dB
PL12       22.00425682 W
PL13       400.1324710 MHz
SF         32768
SF         400.1300046 MHz
WDW        EM
SSB        0
LB         0.30 Hz
GB         0
PC         1.00
    
```

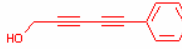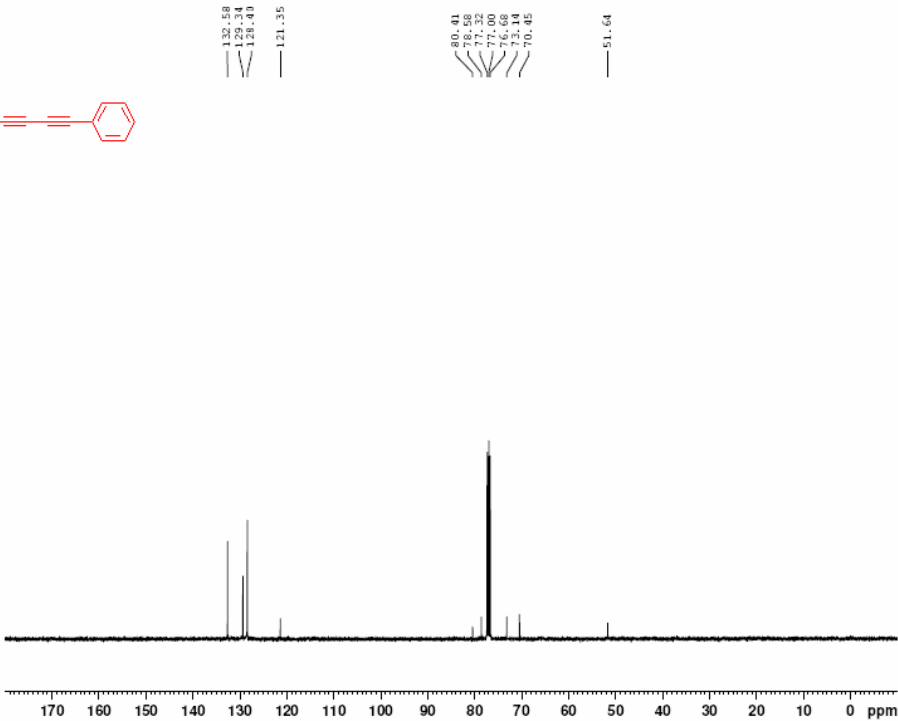

```

NAME      wd0918-2
EXPNO     11
PROCNO    1
Data_     20090919
Time      16.47
INSTRUM   spect
PROBHD    5 mm DABBO BB-
PULPROG   epgq30
TD         65536
SOLVENT   CDCl3
NS         200
DS         4
SWH        24039.461 Hz
FIDRES     0.366799 Hz
AQ         1.3621999 sec
RG         2050
DW         28.900 usec
DE         6.50 usec
TE         295.2 K
D1         2.00000000 sec
D11        0.03000000 sec
D12        1
TD0        1
    
```

```

----- CHANNEL f1 -----
NUC1       13C
P1         9.40 usec
PL1        -2.00 dB
PL12       57.32743073 W
SF         100.6229299 MHz
    
```

```

----- CHANNEL f2 -----
CDPRG2    waltz16
NUC2       1H
PCPD2     90.00 usec
PL2        -2.00 dB
PL12       15.50 dB
PL13       15.50 dB
PL14       18.19349861 W
PL15       0.32353121 W
PL16       0.32353121 W
SF02      400.1316005 MHz
SI         32768
SF         100.6127715 MHz
WDW        EM
SSB        0
LB         1.00 Hz
GB         0
PC         1.40
    
```

3c:

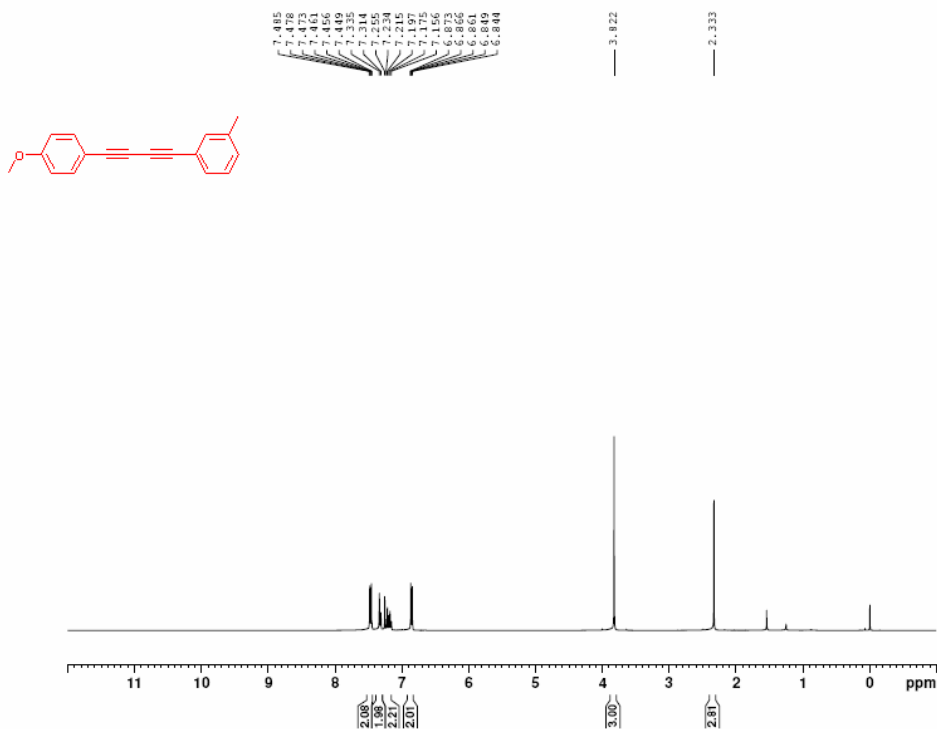

```

NAME wd0918-4
EXPNO 10
PROCNO 1
Date_ 20090918
Time 17.17
INSTRUM spect
PROBHD 5 mm DABBO BB-
PULPROG zgpg30
ID 6536
SOLVENT CDCl3
NS 16
DS 2
SWH 9223.688 Hz
FIDRES 0.125483 Hz
AQ 3.9846387 sec
RG 277
DW 60.950 usec
DE 6.50 usec
TE 294.5 K
D1 1.00000000 sec
D11 1
D10 1
----- CHANNEL f1 -----
NUC1 1H
P1 12.00 usec
PL1 -3.00 dB
SFO1 400.1324713 MHz
SI 32768
SF 400.1300009 MHz
WEN EM
SFB 0
LB 0.30 Hz
GB 0
PC 1.00
    
```

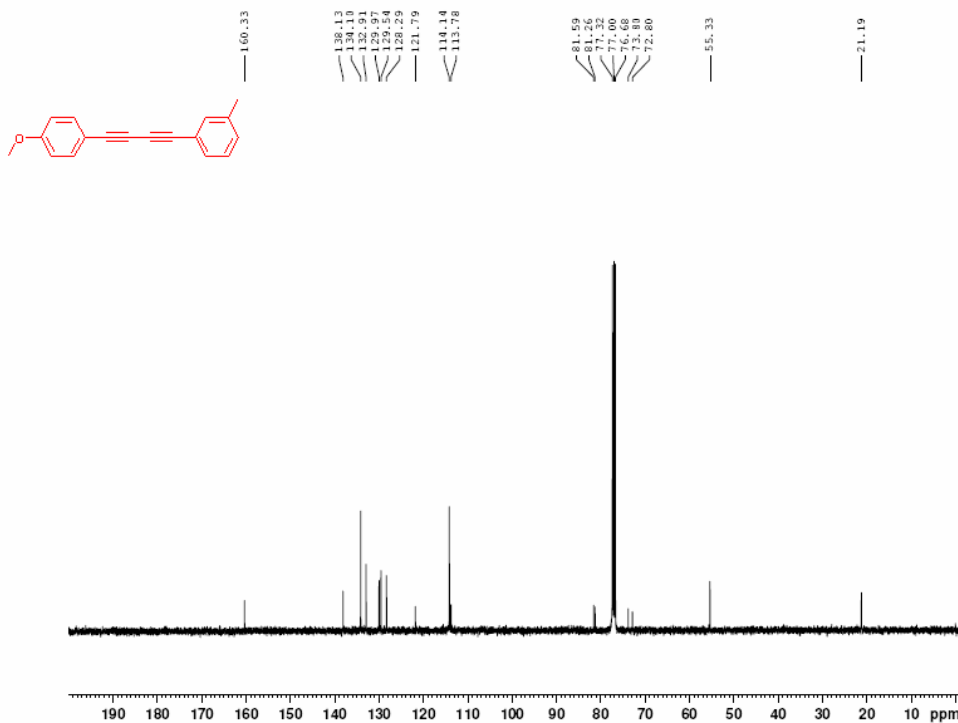

```

NAME wd0918-4
EXPNO 11
PROCNO 1
Date_ 20090918
Time 17.34
INSTRUM spect
PROBHD 5 mm DABBO BB-
PULPROG zgpg30
ID 6536
SOLVENT CDCl3
NS 288
DS 24039.464 Hz
FIDRES 0.366798 Hz
AQ 1.3631989 sec
RG 685
DW 20.800 usec
DE 6.50 usec
TE 295.3 K
D1 2.00000000 sec
D11 0.03000000 sec
D10 1
----- CHANNEL f1 -----
NUC1 13C
P1 9.40 usec
PL1 -2.00 dB
SFO1 57.3274973 MHz
SF01 100.6228298 MHz
----- CHANNEL f2 -----
CPDPRG2 waltz16
NUC2 1H
PCPD2 90.00 usec
PL2 -2.00 dB
PL12 15.50 dB
PL13 15.50 dB
SFO2 19.1934985 MHz
SFO3 0.32353121 MHz
SFO4 0.32353121 MHz
SFO5 400.1316005 MHz
SI 32768
SF 100.6127698 MHz
WEN EM
SFB 0
LB 1.00 Hz
GB 0
PC 1.40
    
```

3d:

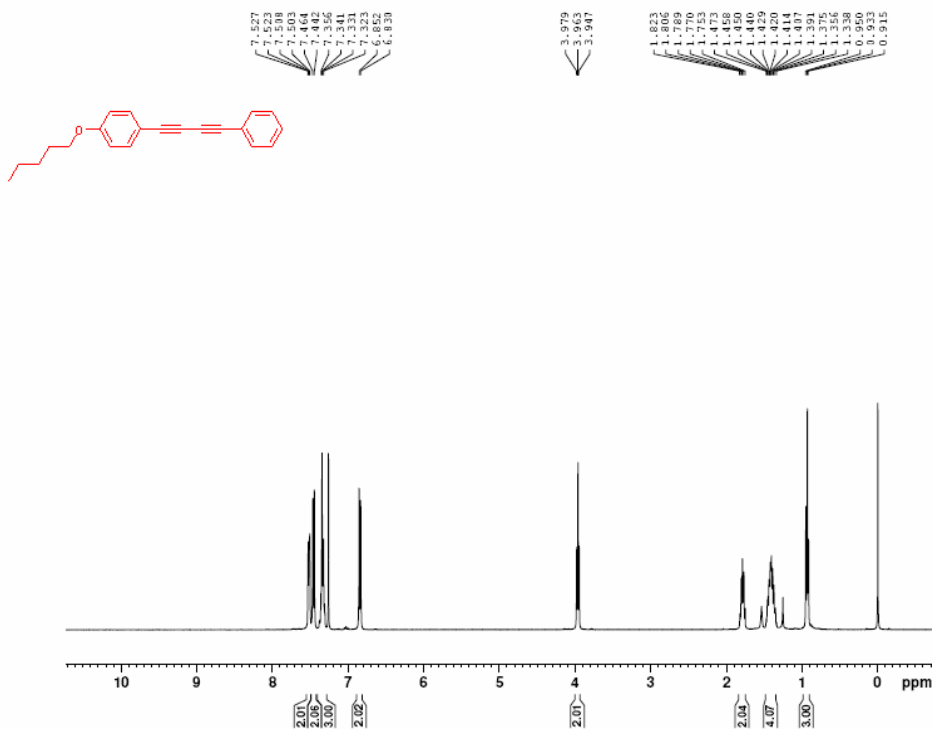

```

NAME wdr-20-1
EXPNO 10
PROCNO 1
F2H4 20090820
Time 16.21
INSTRUM spect
PROBHD 5 mm DABBO BB-
PULPROG zgpg30
TD 65536
SOLVENT CDCl3
NS 16
DS 4
SWH 8223.488 Hz
FIDRES 0.125483 Hz
AQ 3.9846397 sec
RG 262
DW 60.800 usec
DE 6.50 usec
TE 298.2 K
D1 1.00000000 sec
TD0 1
----- CHANNEL f1 -----
NUC1 1H
P1 14.70 usec
PL1 -1.00 dB
PL1W 13.75590801 W
SFO1 400.1324710 MHz
SI 32768
SF 400.1300044 MHz
WDW EM
SSB 0
LB 0.30 Hz
GB 0
PC 1.00
  
```

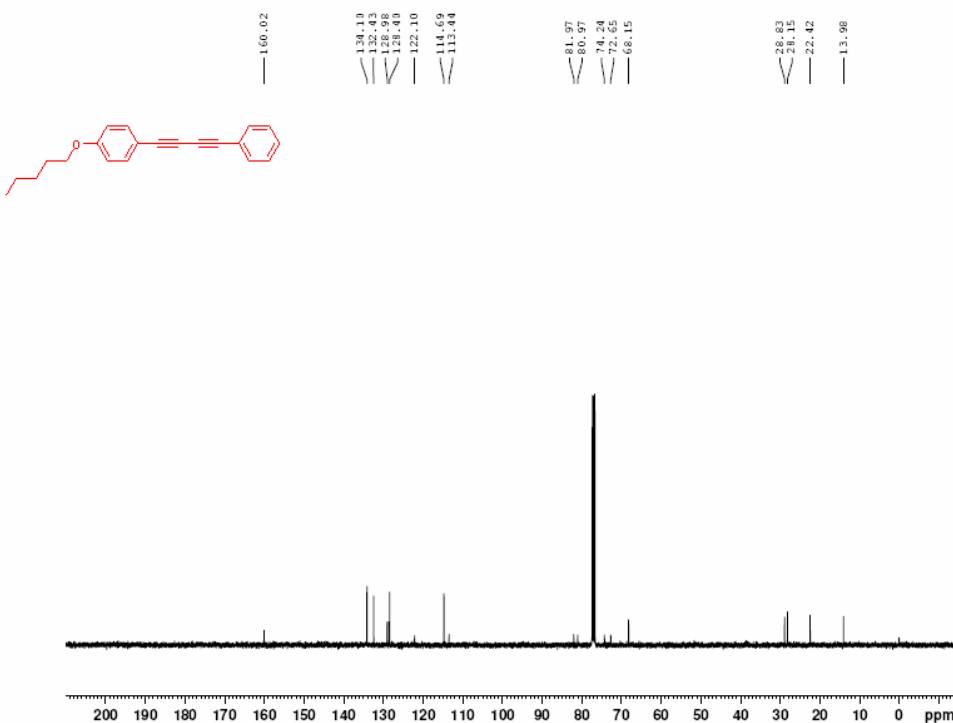

```

NAME wdr-20-1
EXPNO 11
PROCNO 1
F2H4 20090820
Time 16.37
INSTRUM spect
PROBHD 5 mm DABBO BB-
PULPROG zgpg30
TD 65536
SOLVENT CDCl3
NS 250
DS 4
SWH 24038.461 Hz
FIDRES 0.366798 Hz
AQ 1.3631988 sec
RG 114
DW 20.800 usec
DE 6.50 usec
TE 299.3 K
D1 2.00000000 sec
D11 0.03000000 sec
TD0 1
----- CHANNEL f1 -----
NUC1 13C
P1 9.70 usec
PL1 -2.00 dB
PL1W 56.13131005 W
SFO1 100.6228298 MHz
----- CHANNEL f2 -----
CDPRG2 waltz16
NUC2 1H
PCPD2 80.00 usec
PL2 -2.10 dB
PL2 13.00 dB
PL3 13.90 dB
PL1W 17.72104263 W
PL2W 0.44513249 W
PL3W 0.44513249 W
SFO2 400.1318005 MHz
SI 32768
SF 100.6127672 MHz
WDW EM
SSB 0
LB 1.00 Hz
GB 0
PC 1.40
  
```

3e:

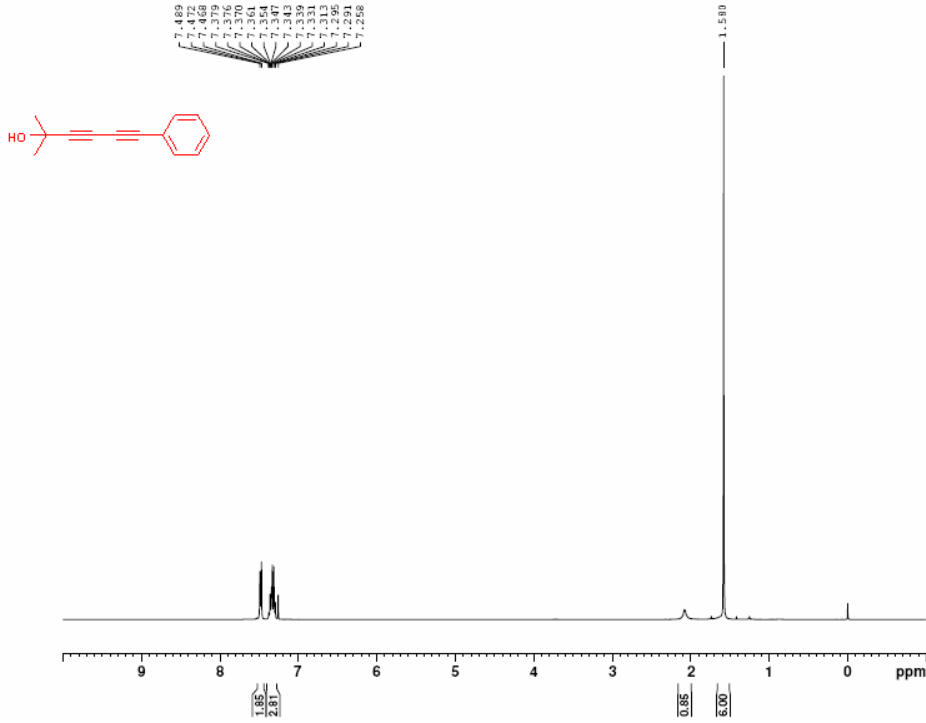

```

NAME      wd0918-3
EXPNO     10
PROCNO    1
Date_     20090918
Time      16.53
INSTRUM   spect
PROBHD    5 mm PABBO BB-
PULPROG   zgpg30
TD         65536
ID         65536
SOLVENT   CDCl3
NS         16
DS         4
SWH        8223.695 Hz
FIDRES     0.125493 Hz
AQ         3.9844397 sec
RG         303
DW         60.800 usec
DE         6.50 usec
TE         295.0 K
D1         1.00000000 sec
D11        1
D12        1
D13        1
D14        1
D15        1
D16        1
D17        1
D18        1
D19        1
D20        1
D21        1
D22        1
D23        1
D24        1
D25        1
D26        1
D27        1
D28        1
D29        1
D30        1
D31        1
D32        1
D33        1
D34        1
D35        1
D36        1
D37        1
D38        1
D39        1
D40        1
D41        1
D42        1
D43        1
D44        1
D45        1
D46        1
D47        1
D48        1
D49        1
D50        1
D51        1
D52        1
D53        1
D54        1
D55        1
D56        1
D57        1
D58        1
D59        1
D60        1
D61        1
D62        1
D63        1
D64        1
D65        1
D66        1
D67        1
D68        1
D69        1
D70        1
D71        1
D72        1
D73        1
D74        1
D75        1
D76        1
D77        1
D78        1
D79        1
D80        1
D81        1
D82        1
D83        1
D84        1
D85        1
D86        1
D87        1
D88        1
D89        1
D90        1
D91        1
D92        1
D93        1
D94        1
D95        1
D96        1
D97        1
D98        1
D99        1
D100       1
  
```

```

----- CHANNEL f1 -----
NUC1       13C
P1         12.00 usec
PL1        0.00 dB
PL1W       22.90425692 W
SFO1       400.1304719 MHz
SI         32768
SF         400.1300913 MHz
WDW        EM
SSB        0
LB         0.30 Hz
GB         0
PC         1.00
  
```

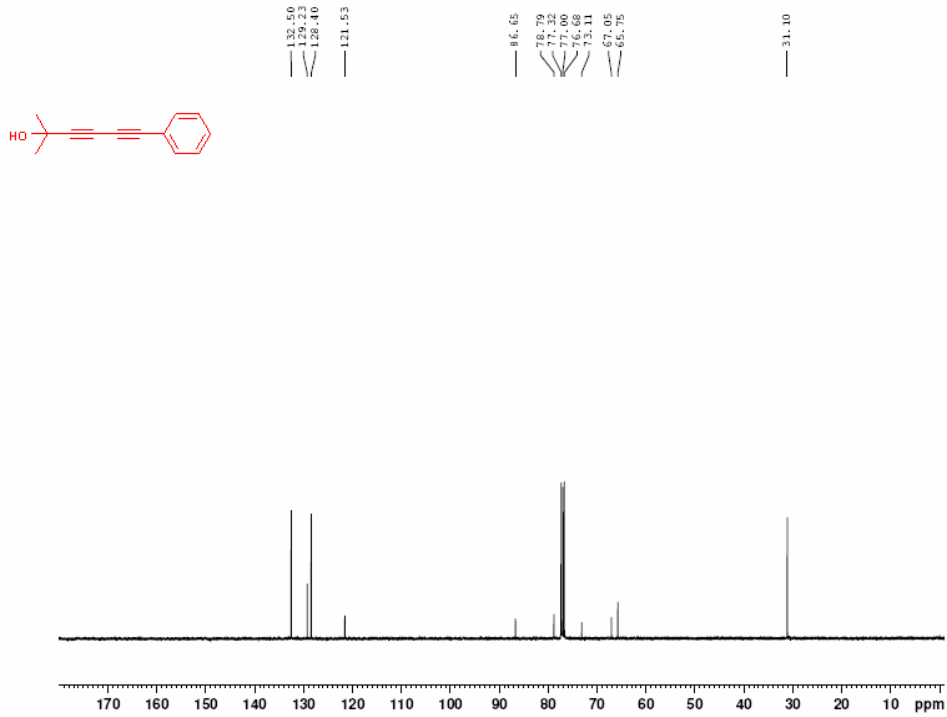

```

NAME      wd0918-3
EXPNO     11
PROCNO    1
Date_     20090918
Time      17.11
INSTRUM   spect
PROBHD    5 mm PABBO BB-
PULPROG   zgpg30
TD         65536
ID         65536
SOLVENT   CDCl3
NS         288
DS         4
SWH        24039.461 Hz
FIDRES     0.366798 Hz
AQ         1.3631898 sec
RG         2050
DW         29.900 usec
DE         6.50 usec
TE         295.4 K
D1         2.00000000 sec
D11        0.03000000 sec
D12        1
D13        1
D14        1
D15        1
D16        1
D17        1
D18        1
D19        1
D20        1
D21        1
D22        1
D23        1
D24        1
D25        1
D26        1
D27        1
D28        1
D29        1
D30        1
D31        1
D32        1
D33        1
D34        1
D35        1
D36        1
D37        1
D38        1
D39        1
D40        1
D41        1
D42        1
D43        1
D44        1
D45        1
D46        1
D47        1
D48        1
D49        1
D50        1
D51        1
D52        1
D53        1
D54        1
D55        1
D56        1
D57        1
D58        1
D59        1
D60        1
D61        1
D62        1
D63        1
D64        1
D65        1
D66        1
D67        1
D68        1
D69        1
D70        1
D71        1
D72        1
D73        1
D74        1
D75        1
D76        1
D77        1
D78        1
D79        1
D80        1
D81        1
D82        1
D83        1
D84        1
D85        1
D86        1
D87        1
D88        1
D89        1
D90        1
D91        1
D92        1
D93        1
D94        1
D95        1
D96        1
D97        1
D98        1
D99        1
D100       1
  
```

```

----- CHANNEL f1 -----
NUC1       13C
P1         9.40 usec
PL1        2.00 dB
PL1W       57.32743973 W
SFO1       100.6228299 MHz
  
```

```

----- CHANNEL f2 -----
CPDPRG2   waltz16
NUC2       1H
PCPD2     90.00 usec
PL2        -2.00 dB
PL12       15.50 dB
PL13       15.50 dB
PL2W       19.19349961 W
PL12W      0.32353121 W
PL13W      0.32353121 W
SFO2       400.1316005 MHz
SI         32768
SF         100.6127704 MHz
WDW        EM
SSB        0
LB         1.00 Hz
GB         0
PC         1.40
  
```

3f:

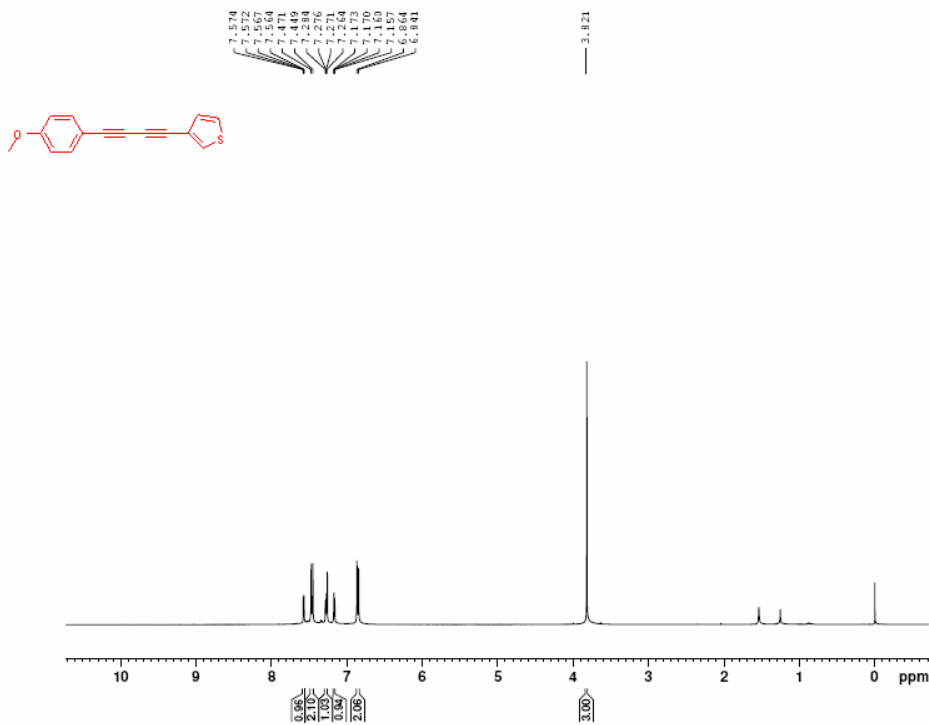

```
NAME wds-20-2
EXPNO 10
PROCNO 1
Data_ 20090820
Time 16.44
INSTRUM spect
PROBHD 5 mm DABBO BB-
PULPROG zgpg30
SOLVENT CDCl3
NS 16
DS 2
SWH 8223.685 Hz
FIDRES 0.125489 Hz
AQ 3.9946397 sec
RG 262
PC 60.800 usec
DE 6.50 usec
TE 297.0 K
D1 1.00000000 sec
TD0 1
```

```
----- CHANNEL f1 -----
NUC1 1H
P1 14.70 usec
PL1 -1.00 dB
PLW 13.75599803 W
SF01 400.1324710 MHz
SI 32768
SF 400.1300000 MHz
WDW EM
SSB 0
LB 0.30 Hz
GB 0
PC 1.00
```

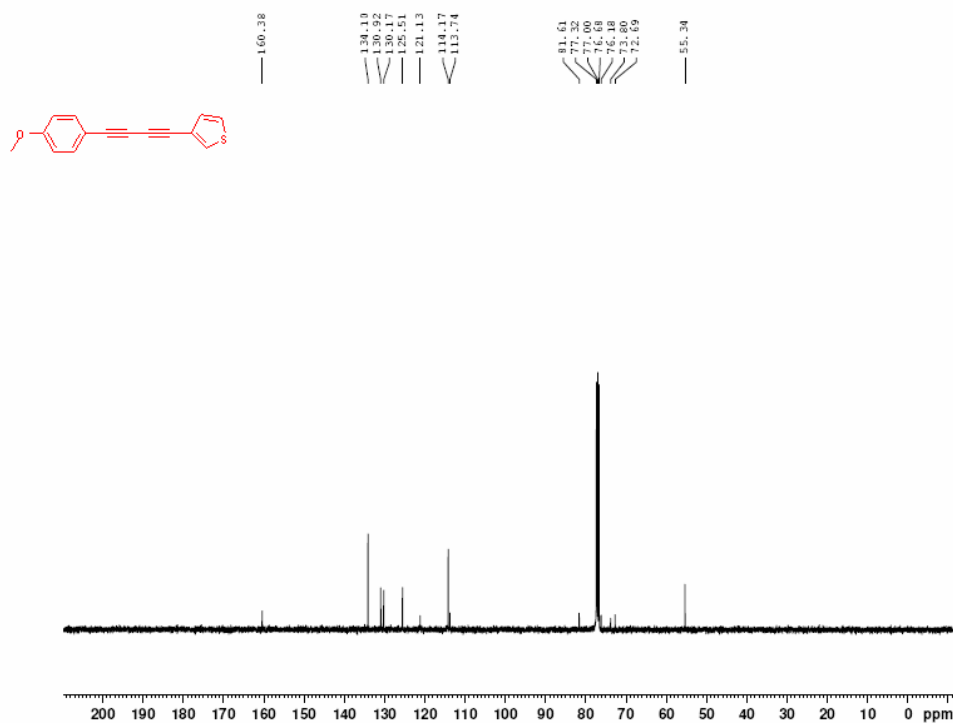

```
NAME wds-20-2
EXPNO 11
PROCNO 1
Data_ 20090820
Time 17.08
INSTRUM spect
PROBHD 5 mm DABBO BB-
PULPROG zgpg30
SOLVENT CDCl3
NS 250
DS 2
SWH 24039.461 Hz
FIDRES 0.366798 Hz
AQ 1.3631998 sec
RG 114
PC 20.800 usec
DE 6.50 usec
TE 298.3 K
D1 2.00000000 sec
D11 0.03000000 sec
TD0 1
```

```
----- CHANNEL f1 -----
NUC1 13C
P1 9.70 usec
PL1 -2.00 dB
PLW 56.13311005 W
SF01 100.6229298 MHz
----- CHANNEL f2 -----
CDPRG2 waltz16
NUC2 1H
PCPD2 80.00 usec
PL2 -2.10 dB
PL12 13.90 dB
PL13 13.90 dB
PLW 17.72818493 W
PL12W 0.44513249 W
PL13W 0.44513249 W
SF02 400.1316005 MHz
SI 32768
SF 100.6127685 MHz
WDW EM
SSB 0
LB 1.00 Hz
GB 0
PC 1.40
```
